# Supplementary material for: NRG1 fusions in breast cancer
Source: Springer Nature journal article supplement (doi:10.1186/s13058-020-01377-5), 2021-01-07
Supplement: MOESM3 [file 18748142]

## Supplementary Textfile 1. Representative raw sequences from cloned full-length cDNA products.

Exon numbering according to their position in the genome, see Supplementary Table 2. The SNP in TENM4 exon 4 was also present in all of 55 RNAseq reads that covered the sequence. The clones for expression—cloned in-frame from the ATG in TENM4 exon5—were also sequenced to confirm the exons here.

Key:

Vector sequence

SAPS3 exon 1

TENM4 exons

TENM4 exon in opposite orientation 'exon int15'

NRG1 exons

microhomology overlap

SNPs or errors in red

### SAPS3-TENM4-NRG1 Clone D

Top transcript shown in Fig. 1. Long isoform with cytoplasmic tail, includes reversed exon TENM4 int15, lacks TENM4 exon 10

Sequencing with T7 primer:

vector

GGATCCACTAGTAACGGCCGCCAGTGTGCTGGA  
ATTCTGCAGATATC

SAPS3 exon 1

TGCTTGATACGTCCGCCATTTTGGGCGCTTCGCTGATGGTGTCCGT  
GAGCGCGTTTCCCGCCTGAGCGCAACTAGCGGCGGGTCTGGGCACCTCAG

TENM4 Exon3:

AAAAGATCCGCACCATCCTCCAGGATCCAATGGCCTTGAGAGAGGGCTGCAGGGCCACGGACATT  
GCTGACTCTTCAGAACGTGCTGACATGGAGCCAG

TENM4 Exon4: [T is a C in reference genome]

GTAGACTGAAATTATCATGTGTCCAAATTAATGCATACTTCAAGGATTATTTGAAGGACTATTCTTAGACC  
CTTTAAGAAGATTTAAAGAAAA

TENM4 Exon5:

ACCACTCGGCCCTGAGTGCGGCGAGGACCCTGTTTGTGGATGTGGAGGA  
GCGCGGGCCGAGGCCATGGACGTGAAGGAGAGGAAGCCTTACCGCTCGCTGACCCGGCG  
CCGCGACGCCGAGCGCCGCTACACCAGCTCGTCCGCGGACAGCGAGGAGGGCAAAGCCCC  
GCAGAAATCGTACAGCTCCAGCGAGACCCTGAAGGCCTACGACCAGGACGCCCGCCTAGC  
CTATGGCAGCCGCTCAAGGACATTGTGCCGAGGAGGCCGAGGAATTCTGCCGCACAG

TENM4 Exon6:

GTGCCAACTTCACCCTGCGGGAGCTGGGGCTGGAAGAAGTAACGCCCCCTCACGGGACCCT  
GTACCGGACAGACATTGGCCTCCCCACTGCGGCTACTCCATGGGGGCTGGCTCTGATGC  
CGACATGGAGGCTGACACGGTGCTGTCCCCTGAGCACCCCGTGCCTGTGGGGCCGGAG  
CACACGGTCAGGGCGCAGCTCCTGCCTGTCCAGCCGGGCCAATTCCAATCTCACACTCAC  
CGACACCGAGCATGAAAACACTGAGACTG

Sequencing with TENM4exon5F:

CCGCCTAGCCTATGGCAGCCGCGTCAAGGACATTGTGCCGCAGGA  
GGCCGAGGAATTCTGCCGCACAG

TENM4 Exon6:

GTGCCAACTTCACCCTGCGGGAGCTGGGGCTGGAAGA  
AGTAACGCCCCCTACGGGACCCTGTACCGGACAGACATTGGCCTCCCCACTGCGGCTA  
CTCCATGGGGGCTGGCTCTGATGCCGACATGGAGGCTGACACGGTGCTGTCCCCTGAGCA  
CCCCGTGCGTCTGTGGGGCCGGAGCACACGGTCAGGGCGCAGCTCCTGCCTGTCCAGCCG  
GGCCAATTCCAATCTCACTCACCGACACCGAGCATGAAAACACTGAGACTG

TENM4 Exon7

ATCATCCGGGCGGCCTGCAGAACCACGCGGGCTCCGGACGCCGCCGCCGCTCTCGCACGCCA  
CACCCCAACCAGCACCACGCGGCCTCCATTAACCTCCCTGAACCGGGGCAACTTCACGCC  
GAGGAGCAACCCAGCCCGGCCCCACGACCCTCGCTCTCCGGAGAGCCCCCTGCCGG  
CGGCGCCAGGAGCCTGCCACGCCAGGAGAAGTGGCTGCTCAACAGCAACATCCCCCT  
GGAGACCAG

TENM4 Exon8

AAACCTAGGCAAGCAGCCATTCTAGGGACATTGCAGGACAACCTCATTGA  
GATGGACATTCTCGGCGCCTCCGCCATGATGGGGCTTACAGTGACGG

TENM4 Exon9

GCACTTCTCTTCAAGCCTGGAGGCACCTCCCCGCTCTTCTGCACCACATCACCAGGGTACCCACTGACGTC  
CAGCACAGTGTACTCTCTCCGCCCGACCCCTGCCCGCAGCACCTTCGCCCGGCCGGC  
CTTTAACCTCAAGAAGCCCTCCAAGTACTGTAAGTGAAGTGCAGCCCTGAGCGCCAT  
CGTCATCTCAGCCACTCTGGTCATCTGCTGGCATACTTTGTGG

TENM4 Exon11

GAAAGCCAGTAGTTTCTTCCAGAGGACAN TTCATAGATTCTGGAGAAATTGATGTGGG

Sequencing with NRG1exon9R:

NRG1 Exon 9 (reverse strand)

GCACATTTACAAGATGGCTTGTCCCAGTGGTGGATGTAGATGTAG

NRG1 Exon 6 (reverse strand)

ATGAAGAAGTATTTGCTCCTTCTGTGGATACTGATATTCTAATGGGAGACT

NRG1 Exon 5 (reverse strand)

CTGAAGACACATATGCTCCTCAGTTGAGGCTGGCATAACCAGTGATGATCT

NRG1 Exon 4 (reverse strand)

CGTTTGATTCCACGATGGTGATATTGGCAGAGGCACTGTCATTTCTAATTTGCTGATCACTTTGCACATATACT  
CTCCAGAATCAGCCAGTGATGCTTTGTTAATGCGAAGTTCTGACTTC

NRG1 Exon 3 (reverse strand)

CCTGGCTTTTTTGTATCTTGATATTTGTGGTTTGTTTTTTCGATTCAATTCATTCCCATTCTTGAACCACTTGAA  
TCTGAGAGAGGAGTATTCAGAACTGGTTTACACCCGAAGGACTAGTTTGGAACTGCAGCCGATTCTGGCTT  
TTCATCTTTCAATCGGGGAGGCAAGG

TENM4int15 (reverse strand)

CTGATTCCAAGCCTCTTCTCT  
GAAAAATCACAGAATCTTGAACAGTTACGTGAGCACTCTGTCCTGTACCACTGGAATC

TENM4 Exon 12 (reverse strand)

CAATGGCAGTGGTGAGAAAGGAAACCACTTCTGACTCCTTCCGTCATTGTAAAAAGCCAAGT

GCCAGATTCTGAATCCAAATACTGGATGAAGCCTGTCTCATGGCTGGAGGGGGGCACAG  
TTCCCCGAGACTGGCGCGGGGTCCCCTCTAGGCTCCGCGCCTCCTGGGTTAGGAGCCTCC  
TGCCATCCAGCAGCTCCACAAAGTCAA

Partial TENM4 Exon 11 (reverse strand)

CTGTGTATGTGAAGGAGGGAGGCCTTTTCTGC  
CATAAATGCCAACCCAGGGCTGCCTTTCCAGAGACACATTGAATTCAGATGCACAGGAT  
GGTCTATGAACACTTGAGATCTCCAGAAAGTGCCAGGAGGAATCTTCTGGGAAGCTCGCC  
TTCCACATCAATTTCTCCAGAATCTATGAAACTGTCCTCTGGAAAGAA

Sequencing with NRG1exon4F:

Partial NRG1 Exon4:

GAAATGACAGTGCCTCTGCCAATATCACCATCGTGAATCAAACG

NRG1 Exon5:

AGATCATCACTGGTATGCCAGCCTCAACTGAAGGAGCATATGTGTCTTCAG

NRG1 Exon6:

AGTCTCCATTAGAATATCAGTATCCACAGAAGGAGCAAATACTTCTTCAT

NRG1 Exon9:

CTACATCTACATCCACCACTGGGACAAGCCATCTTGTAATAATGTGCGGAGAAGGAGAAAACCTTCTGTGTG  
AATGGAGGGGAGTGCTTCATGGTGAAGACCTTCAAACCCCTCGAGATACTTGTGCAA

NRG1 Exon11:

GTGCCAAATGAGTTTACTGGTGATCGCTGCCAAAACCTACGTAATGGCCAGCTTCTACA

NRG1 Exon13:

AGGCGGAGGAGCTGTACCAGAAGAGAGTGCTGACCATAACCGGCATCTGCATCGCCCTCCTT  
GTGGTCGGCATCATGTGTGTGGTGGCCTACTGCAAAACCAA

NRG1 Exon14:

GAAACAGCGGAAAAAGCTGCATGACCGTCTTCGGCAGAGCCTTCGGTCTGAACGAAACAATATGATGAACAT  
TGCCAATGGGCCTCACCATCTAACCCACCCCGAGAATGTCCAGCTGGTGAAT

NRG1 Exon15:

CAATACGTATCTAAAAACGTCACTCTCCAGTGAGCATATTGTTGAGAGAGAAGCAGAGACATCCTTTCCACC  
AGTCACTATACTTCCACAGCCCATCACTCCACTACTGTCACCCAGACTCCTAGCCACAG

NRG1 Exon16:

CTGGAGCAACGGACACACTGAAAGCATCCTTTCCGAAAGCCACTCTGTAATCGTGATGTCA  
TCCGTAGAAAACAGTAGGCACAGCAGCCAACTGGGGGCCAAGAGGACGTCTTAATGGC  
ACAGGAGGCCCTCGTGAATGTAACAGCTTCTCAGGCATGCCAGAGAAACCCCTGATTC  
CTACCGAGACTCTCCTCATAGTGAAAG

Partial NRG1 Exon18:

GTATGTGTCAGCCATGACCACCCCGGCTCGTATGTCACCTGTAGATTTCCACACGCCA

Sequencing with SP6 primer:

NRG1 Exon18 (reverse strand):

TTTTCTGTTTTCTATTTGCAGAACTGCTAAAATAAAATAAA  
TTGTTTAATTTAAGGTGGAATACTTTATTATATAAAATAAAGTTTTACAGGTGAATCTAT  
GTGTTTATTTAGGTTTTATACAGCAATAGGGTCTTGGTTAGCAATTACACTAGACAGCCT  
GGCCTGGATTTCTTCTGTGTCGAGAAGCGGCCTGCTGGGTTAGTCCTGCTGTCAGCCAG  
GCGGAAGGCAGGTGTTGCCTCAAGACTGGCTGCCAGGGGTTCTGTATGCCAGGAAAGG  
CGTATCTTCACTACTCTTTCATCTTCTGTTTCACTCTCTGAGTTACTGCTCTGGGAGCT  
TGTGTTGCTGTCCACTTCCAATCTGTTAGCAATGTGGCCATTGGGCTTGGTTCTTTTGGC  
CCGCCGGCTATTGGCGAGTTTCTTAACAGGCTCTTGGGCTGGCTCGTACTCTTGGGTCGT

TTCATACTCCTCATCTCCACTATCCTCAAGGGGCTAGCAGGGAGGCTGTTACTGTCATG  
CGCGGGGTTGTGGTGAAGGAGCTGAACTGCTGAGGGTGATGGTCAAACCTCTTCTCCCG  
CAGCCTTGGTGGTGTACGAGAAGTAGAGGTCTCTTCTTCCATGAAGGGGCTGACCGC  
CATGGAAGGCATGGACACCGTCATGCTGGACACGGGTGGAGACATTTCCGAAGGGGCGA  
TTTGGGGGAGCTTGGCGTGTGGAAATCTACAGGTGACATACGAGCCGGGGTGGTCATGGC  
TGACACATAC

NRG1 Exon16 (reverse strand):

CTTTCACTATGAGGAGAGTCTCGGTAGGAATCAGGGGTTTCTCTGGCATGCCTGAGGAAGCTGTTACATTAC  
GAGGGCCTCCTGTGCCATTAAGACGTCCTC  
Continued Exon 16 declining quality sequence:  
TTGGGC CCCAGTTGGGCTGCTGTGCCTACTGTTTTCTACGGATGACATCACNAATTACAGAGTGG  
CTTTCGAAAGNATGCTTTTCAGTGTGTCCGTTGCTCCAG

### SAPS3-TENM4-NRG1 Clone 5

Marked with asterisk in Fig.1. Short isoform matching original cDNA reported by Schaefer et al. (1997). Terminates in extended exon 11 of NRG1.

Sequencing with T7 primer:

vector

GGATCCACTTAGTAACGGCCGCCAGTGTGCTGGA  
ATTCTGCAGATATC

SAPS3 exon 1

TGCTTGATACGTCCGCCATTTTGGGCGCTTCGCTGATGGTGTCCGT  
GAGCGCGTTTCCCGCCTGAGCGCAACTAGCGCGGGTCTGTTGGCACCTCAG

TENM4 Exon3:

AAAAGATCCCGCACCATCCTCCAGGATCCAATGGCCTTGAGAGAGGGCTGCAGGGCCACGGACATT  
GCTGACTCTTCAGAACGTGCTGACATGGAGCCAG

TENM4 Exon4: [T is a C in reference genome]

GTAGACTGAAATTAATCATGTGTCCAAATTAATTTGCATACTTCAAGGATTATTTGAAGGACTATTCTTAGACC  
CTTTAAGAAGATTTAAAGAAAA

TENM4 Exon5:

ACCACTCGGCCCTGAGTGCGGCAGGACCCTGTTTGTGGATGTGGAGGAGCGCGGGCCGGAGGCCATGGAC  
GTGAAGGAGAGGAAGCCTTACCCTGCTGACCCGCGCCGACGCGGAGCGCCGCTACACCAGCTCGTCC  
GCGGACAGCGAGGAGGGCAAAGCCCCGAGAAATCGTACAGCTCCAGCGAGACCCTGAAGGCCTACGACCA  
GGACGCCCGCTAGCCTATGGCAGCCGCGTCAAGGACATTGTGCCGAGGAGGCCGAGGAATTCTGCCGCAC  
AG

TENM4 Exon6:

GTGCCAACTTCACCCTGCGGGAGCTGGGGCTGGAAGAAGTAACGCCCCCTCACGGGACCCT  
GTACCGGACAGACATTGGCCTCCCCACTGCGGCTACTCCATGGGGGCTGGCTCTGATGC  
CGACATGGAGGCTGACACGGTGTGTCCCTGAGCACCCCGTGCCTGTGGGGCCGGAG  
CACACGGTCAGGGCGAGCTCCTGCCTGTCCAGCCGGGCCAATTCCAATCTCACACTCA  
CCGACACCGAGCATGAAAACACTGAGACTG

Partial TENM4 Exon7:

ATCATCCGGGCGGCCTGC

Sequencing with TENM4exon5F:

TENM4 Exon5:

CCGCTAGCCTATGGCAGCCGCGTCAAGGACATTGTGCCGAGGAGGCCGAGGAATTCTGCCGCACAG

TENM4 Exon6:

GTGCCAACTTCACCCTGCGGGAGCTGGGGCTGGAAGAAGTAACGCCCCCTCACGGGACCCTGTACCGGACAG  
ACATTGGCCTCCCCACTGCGGCTACTCCATGGGGGCTGGCTCTGATGCCGACATGGAGGCTGACACGGTGTCT

GTCCCCTGAGCACCCCGTGCCTGTGTTGGGGCCGGAGCACACGGTCAGGGCGCAGCTCCTGCCTGTCCAGCCG  
GGCCAATTCCAATCTCACTCACCGACACCGAGCATGAAAACACTGAGACTG

TENM4 Exon7:

ATCATCCGGGCGGCCTGCAGAACCACGCGCGGCTCCGGACGCCGCCGCCGCTCTCGCACGCCACACC  
CCCAACCAGCACCACGCGGCCTCCATTAACCTCCCTGAACCGGGCAACTTACGCCGAGGAGCAACCCAGCC  
CGGCCCCACGGACCACTCGCTCTCCGGAGAGCCCCCTGCCGGCGGGCGCCAGGAGCCTGCCACGCCAGG  
AGAAGTGGCTGCTCAACAGCAACATCCCCCTGGAGACCAG

TENM4 Exon8:

AAACCTAGGCAAGCAGCCATTCTAGGGACATTGCAGGACAACCTCATTGAGATGGACATTCTCGGCGCCTCC  
CGCCATGATGGGGCTTACAGTGACGG

TENM4 Exon9:

GCACTTCTCTTCAAGCCTGGAGGCACCTCCCCGCTCTTCTGCACCACATCACCAGGGTACCCACTGACGTCCA  
GCACAGTGTACTCTCTCCGCCCGACCCCTGCCCGCAGCACCTTCGCCCGGCCGGCCTTTAACCTCAAGAAG  
CCCTCAAGTACTGTAAGTGAAGTGCAGCCCTGAGCGCATCGTCATCTCAGCCACTCTGGTCATCTGCTGCT  
GCATACTTTGTGG

Partial TENM4 Exon 10:

CCATGCACCTGTTTGGCCTAAACTGGCACCTGCAGCCGATGGAGGGGCAGATGTATGAGAT

Sequencing with NRG1exon9R:

Partial NRG1 Exon 9 (reverse strand):

AGATGGCTTGTCCCAGTGGTGGATGTAGATGTAG

NRG1 Exon6 (reverse strand):

ATGAAGAAGTATTTGCTCCTTCTGTGGATACTGATATTCTAATGGGAGACT

NRG1 Exon 5 (reverse strand):

CTGAAGACACATATGCTCCTCAGTTGAGGCTGGCATAACAGTGATGATCT

NRG1 Exon4 (reverse strand):

CGTTTGATTCCACGATGGTGATATTGGCAGAGGCACTGTCAATTCCTAATTTGCTGATCACTTTGCACATATACT  
CTCCAGAATCAGCCAGTGATGCTTTGTTAATGCGAAGTTCTGACTTC

NRG1 Exon3 (reverse strand):

CCTGGCTTTTTTGTATCTTGATATTTGTGGTTTGTTTTTCGATTCAATTCATTCCCATTCTTGAACCACTTGAA  
TCTGAGAGAGGAGTATTCAGAAGTGGTTTACACCCGAAGGACTAGTTTGGAACTGCAGCCGATTCC  
TGGCTTTTCATCTCTTCAATCGGGGAGGCAAGG

TENM4 Exon12 (reverse strand):

CAATGGCAGTGGTGAGAAAGGAAACCACTTCTGACTCCTTCCGTCATTGTAAAAAGCCAAGTGCCAGATTCC  
TGAATCCAAATACTGGATGAAGCCTGTCTCATGGCTGGAGGGGGGCACAGTTCCCCGAGACTGGCGCGGGGT  
CCCCTAGGCTCCGCGCCTCCTGGGTTAGGAGCCTCCTGCCATCCAGCAGCTCCACAAAGTCAA

TENM4 Exon11 (reverse strand):

CTGTGTATGTGAAGGAGGGAGGCCTTTTCTGCCATAAATGCCAACCAGGGCTGCC  
TTTCCAGAGACACATTGAATTTAGATGCACAGGATGGTCTATGAACACTTGAGATCTC  
CAGAAAGTGCCAGGAGGAATCTTCTGGGAAGCTCGCCTTCCACATCAATTTCTCCAGAA  
TCTATGAAACTGTCTCTGGAAAGAACTACTGGGCTTTC

TENM4 Exon10 (reverse strand):

CTTCTGTGGTTCCTTGCCTT

contnuing low quality

NCCTGTCAGGGGTCTTAAGCCAGTGCCCCcTGAGGGGTATANGGGAGACGTCGGTTGGCACAGGCCACCT  
GcCTGGCTGTGCTCCGTGATCTCATACATCTGNCCCCTCCATCG  
GCTGCAGGTGCCAGTTTNAAGGCCAAACAGGTGCATGG

Sequencing with SP6 primer:

GCTGCTCGAGCGGCCGC

Extended Exon 11(reverse strand):

AGCTCTAGGTGGAATCTGAGGGGAGATGCAGCAACAAGAAAGCA  
GCACCAACTGAGCATGCTC

NRG1 Exon11 (reverse strand):

CTATTCAGGCAGAGACAGAAAGGGAGTGGACGTACTGTAGAAGCTGGCCATTACGTAGTTTTGGCAGCGATC  
ACCAGTAAACTCATTGGGCAC

NRG1 Exon9 (reverse strand):

TTGCACAAGTATCTCGAGGGGTTTGAAAGGTCTTTCACCATGAAGCACTCCCCTCCATTCACACAGAAAGTTTT  
CTCCTTCTCCGCACATTTACAAGATGGCTTGCCAGTGGTGGATGTAGATGTAG

NRG1 Exon6 (reverse strand):

ATGAAGAAGTATTTGCTCCTTCTGTGGATACTGATATTCTAATGGGAGACT

NRG1 Exon5 (reverse strand):

CTGAAGACACATATGCTCCTCAGTTGAGGCTGGCATAACCAGTGATGATCT

NRG1 Exon4 (reverse strand):

CGTTTGATTCCACGATGGTGATATTGGCAGAGGCACTGTCATTTCTAATTTGCTGATCACTTTGCACATATACT  
CTCCAGAATCAGCCAGTGATGCTTTGTTAATGCGAAGTTCTGACTTC

NRG1 Exon3 (reverse strand):

CCTGGCTTTTTTTGTATCTTGATATTTTGTGGTTTGTTTTTTCGATTCAATTCATTCCCATTCTTGAACCACT  
TGAATCTGAGAGAGGAGTATTCAGAAGTGGTTTACACCCGAAGGACTAGTTTGGAACTG  
CAGCCGATTCTGGCTTTTCATCTCTTCAATCGGGGAGGCAAGG

TENM4 Exon12 (reverse strand):

CAATGGCAGTGGTGAGAAAGGAAACCACTTCTGACTCCTTCCGTCATTGTAAAAAGCCAAGTGCCAGATTCC  
TGAATCCAAATACTGGATGAAGCCTGTCTCATGGCTGGAGGGGGGGCACAGTTCCCCGAGACTGGCGCGGG  
GTCCCCTCTAGGCTCCGCGCCTCTGGGTTAGGAGCCTCCTGCCATCCAGCAGCTCCACAAAGTCAA

Partial TENM4 Exon11 (reverse strand):

CTGTGTATGTGAAGGAGGGAGGCCTTTTTCTGCCATAAATGCCAACCAGGGCTGCCTTTCCAGAAACACATT  
GAANTTTCAGATGCCCAGGATGGTCTATGAACACTTGANATCTCCAGAAAGTGCCAGGAGGAATCTTCTGGG
